# Supplementary material for: A Study of the Reliability and Accuracy of the Real-Time Detection of Forage Maize Quality Using a Home-Built Near-Infrared Spectrometer
Source: MDPI journal article supplement (doi:10.3390/foods11213490), 2022-11-03
Supplement: s1 [file s1]

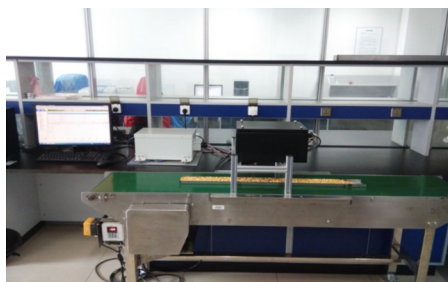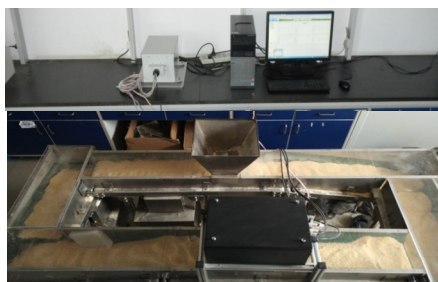

A: Home-built grating online NIR spectrometer

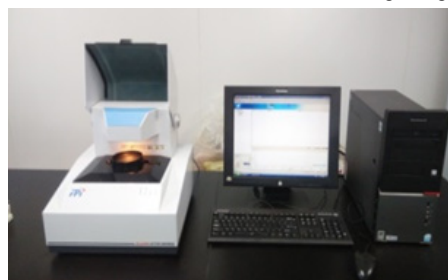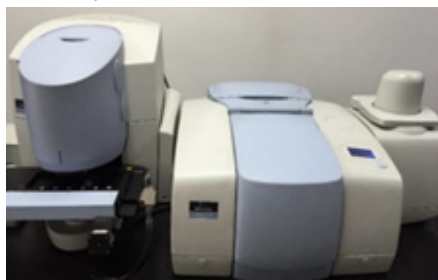

B: SupNIR-2700 grating NIR spectrometer

C: Spectrum 400 diffuse reflection FT NIR spectrometer

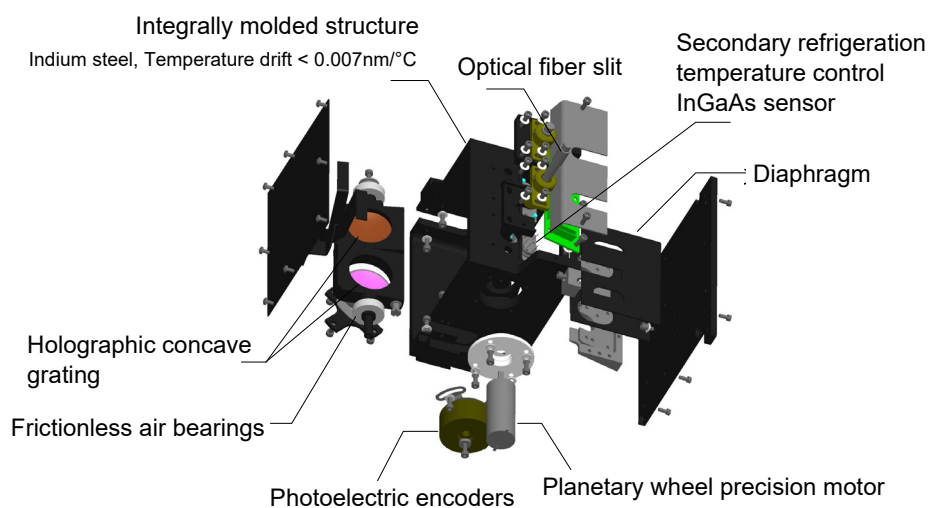

D: A schematic layout of home-built grating online NIR spectrometer

Figure S1 Three different types of near infrared spectrometers

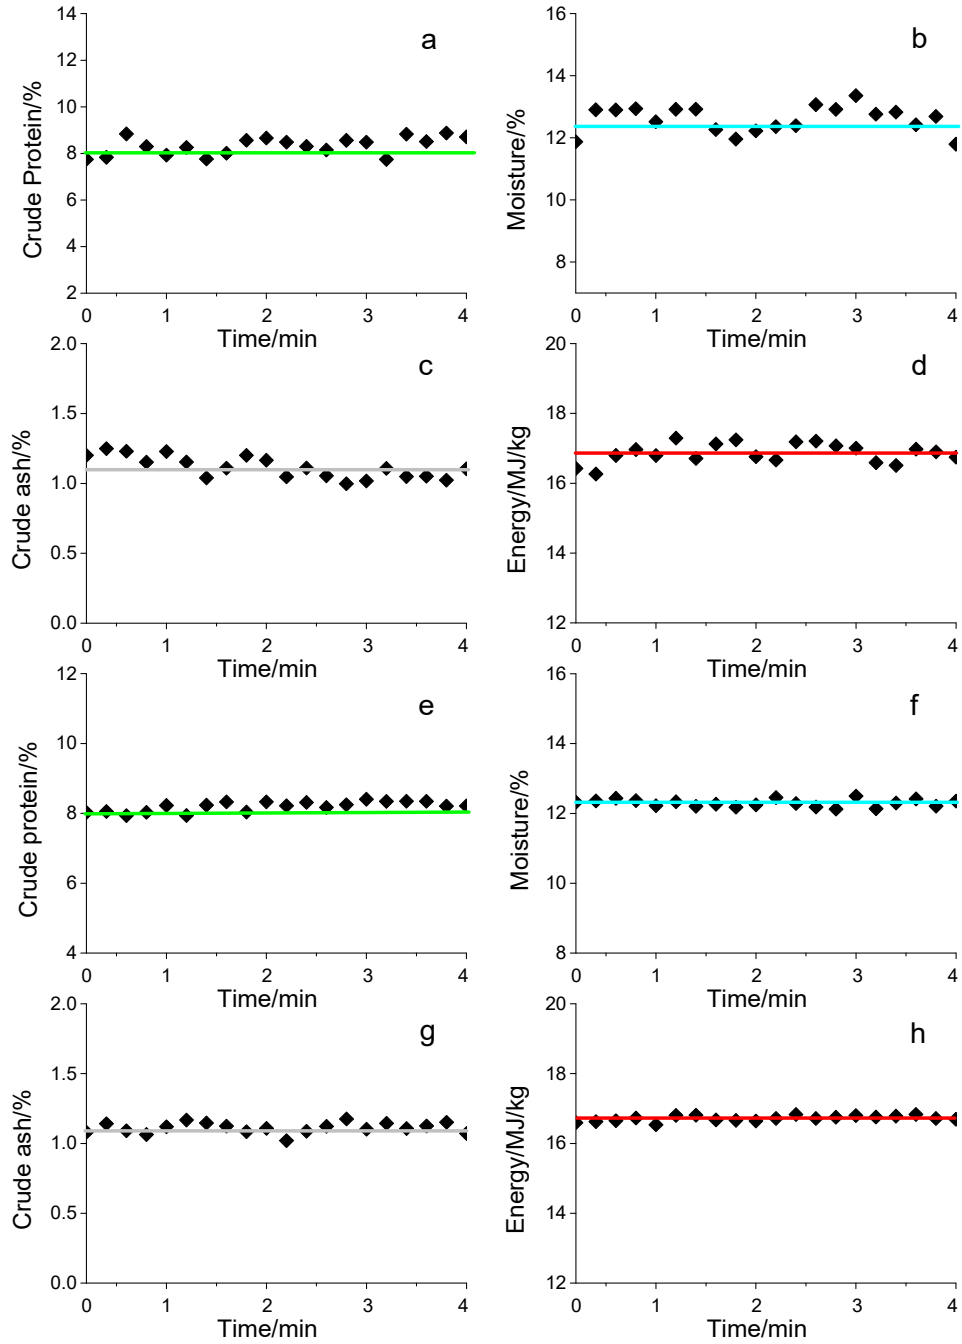

Figure S2 Repeatability of NIR online model of raw and crushed forage maize for crude protein, moisture, crude ash, and energy (a-d, raw forage maize; e-h, crushed forage maize)

Table S1 Orthogonal experimental results of influence factors of NIR online analysis

| Number | Parameters                       |                                       |            | RMS    |
|--------|----------------------------------|---------------------------------------|------------|--------|
|        | Detection<br>optical path<br>/cm | Conveyor<br>speed /cm s <sup>-1</sup> | Scan times |        |
| 1      | 8                                | 10                                    | 8          | 0.0143 |
| 2      | 8                                | 20                                    | 16         | 0.0098 |
| 3      | 8                                | 30                                    | 32         | 0.0065 |
| 4      | 12                               | 10                                    | 32         | 0.0030 |
| 5      | 12                               | 20                                    | 8          | 0.0095 |
| 6      | 12                               | 30                                    | 16         | 0.0041 |
| 7      | 16                               | 10                                    | 16         | 0.0057 |
| 8      | 16                               | 20                                    | 32         | 0.0034 |
| 9      | 16                               | 30                                    | 8          | 0.0108 |

Table S2 Quantitative model results of crude protein of forage maize at different detection optical path, particle size and conveyor speed

|                                    | Parameters | Calibration |         | Validation |         |      |
|------------------------------------|------------|-------------|---------|------------|---------|------|
|                                    |            | Rc          | RMSEC/% | Rp         | RMSEP/% | RPD  |
| Detection optical path /cm         | 8          | 0.93        | 0.29    | 0.84       | 0.39    | 1.65 |
|                                    | 10         | 0.92        | 0.33    | 0.81       | 0.37    | 1.73 |
|                                    | 12         | 0.94        | 0.24    | 0.90       | 0.31    | 2.32 |
|                                    | 14         | 0.94        | 0.28    | 0.85       | 0.39    | 1.86 |
|                                    | 16         | 0.94        | 0.27    | 0.86       | 0.41    | 1.62 |
| Particle size /mm                  | 0.425      | 0.96        | 0.22    | 0.96       | 0.17    | 3.78 |
|                                    | 1          | 0.95        | 0.25    | 0.91       | 0.27    | 2.41 |
|                                    | Raw Sample | 0.94        | 0.24    | 0.89       | 0.31    | 2.32 |
| Conveyor speed /cm s <sup>-1</sup> | 0          | 0.94        | 0.24    | 0.89       | 0.31    | 2.32 |
|                                    | 5          | 0.93        | 0.25    | 0.84       | 0.33    | 1.76 |
|                                    | 10         | 0.93        | 0.29    | 0.78       | 0.40    | 1.56 |
|                                    | 20         | 0.91        | 0.32    | 0.75       | 0.41    | 1.52 |

Table S3 Signal-to-noise ratio and change rate of peak area at different conveyor speed

| Conveyor speed /cm s <sup>-1</sup> |                         | 5       | 10      | 20      |
|------------------------------------|-------------------------|---------|---------|---------|
| Signal-to-noise ratio              | 1450 nm (Moisture)      | -28.260 | -11.916 | -7.156  |
|                                    | 1730 nm (Crude protein) | -50.098 | -21.777 | -13.531 |
|                                    | 2250 nm (Crude lipid)   | 3.053   | 1.923   | 1.811   |
| Peak area                          | 1                       | -0.623  | -0.600  | -0.583  |
|                                    | 2                       | -0.620  | -0.599  | -0.599  |
|                                    | 3                       | -0.619  | -0.593  | -0.576  |
|                                    | 4                       | -0.617  | -0.593  | -0.575  |
|                                    | 5                       | -0.615  | -0.589  | -0.571  |
|                                    | 6                       | -0.614  | -0.569  | -0.561  |
|                                    | Average                 | -0.618  | -0.591  | -0.577  |
| Change rate                        |                         | 0.003   | 0.011   | 0.013   |

Table S4 Result of multivariate analysis of variance

|     | Quadratic sum | Degree of freedom | Mean-square value            | F       |
|-----|---------------|-------------------|------------------------------|---------|
| A   | 3.57089E-05   | 2                 | 1.79E-05                     | 46.848  |
| B   | 4.82222E-07   | 2                 | 2.41E-07                     | 0.633   |
| C   | 8.23089E-05   | 2                 | 4.12E-05                     | 107.985 |
| SSE | 0.0000        | 2.0000            | F0.95(2, 2)=19; F0.9(2, 2)=9 |         |
| SST | 0.0001        | 8.0000            |                              |         |

A: detected optical path; B: conveyor speed; C: spectra scan times.
